# Supplementary figures and images for: Location of disorder in coiled coilproteins is influenced by its biological role and subcellular localization: a GO-based study on human proteome
Source: Royal Society of Chemistry journal article supplement (doi:10.1039/c1mb05210a), 2011-10-25

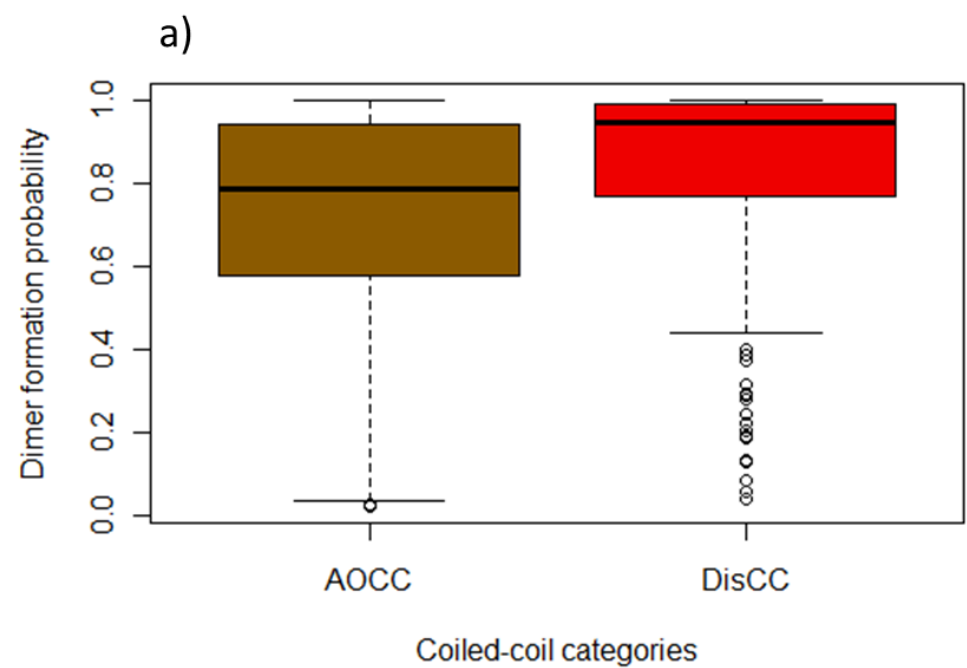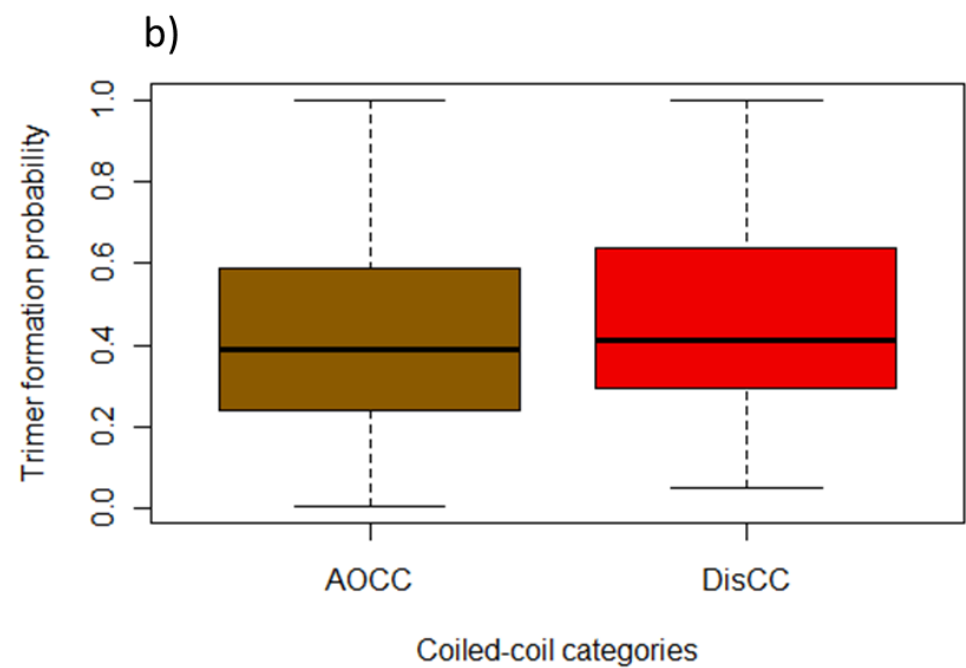

Supplement: c1mb05210a.pdf [file c1mb05210a.pdf]
